# Supplementary material for: A spectrometric analysis of variedly purified cinnabar in a siddha drug – linga chendhooram
Source: publisher site journal article supplement (doi:10.1515/jcim-2024-0052), 2024-05-29

மத்திய சித்த மருத்துவ ஆராய்ச்சிக் குழுமம்

ஆயுஷ் அமைச்சகம், இந்திய அரசு, அரும்பாக்கம், சென்னை-106

केंद्रीय सिद्ध अनुसन्धान परिषद्

आयुष मंत्रालय, भारत सरकार

सिद्ध केंद्रीय अनुसन्धान संस्थान भवन, अण्णा सरकारी अस्पताल परिसर, अरुम्बाक्कम, चेन्नई - 600106

**CENTRAL COUNCIL FOR RESEARCH IN SIDDHA**

Ministry of AYUSH, Govt. of India

SCRI Building, Anna Govt. Hospital Campus, Arumbakkam, Chennai – 600106

Phone: 2621 1621, 2621 2421 Fax: 044-2621 1621

www.siddhacouncil.com, www.siddharesearchcouncil.org, Email: ccrschennai@gmail.com

F.No.1-153/2021-22/CCRS/Tech./ 5SD

3<sup>rd</sup> January, 2022

To

Ms. Shivani. G,  
PI of the Mini Project,  
Santhigiri Siddha Medical College  
Thiruvananthapuram.

Dear Student,

Sub.: Mini Project Research Grant – Reg.

With the approval of the scrutinizing committee, I accord the approval for the sanction of mini project research grant in commemoration with the observance of Fifth Siddha Day. In this regard, an amount of Rs.15,000/- (Rupees Fifteen thousand only) for the mini project entitled “A comparative analysis of heavy metals using atomic absorption Spectrometry in Lingam before and after purification using two different purification methods and Linga chendhooram prepared from two differently purified lingam” under UG category will be awarded to the Principal Investigator, Ms. Shivani. G, Santhigiri Siddha Medical College, Chennai.

I hereby direct to adhere the research conduct during execution and abide by the terms and conditions of the Mini project Research Grant of CCRS. The students must publish the outcomes of the mini project in the peer reviewed journal preferably in Journal of Research in Siddha Medicine and not in any other predatory journals.

The grant amount will be released to the Principal of the respective institution upon submission of the Ethical clearance (if relevant to the project) in original.

Prof. Dr. K. Kannakavalli

Director, General

Copy to:

1. The Principal, Santhigiri siddha Medical College, Thiruvananthapuram.
2. Dr. S. Baskaran, Assistant Professor & Guide of the Mini Project, Santhigiri Siddha Medical College, Thiruvananthapuram.

AUTHENTICATION CERTIFICATE

Certificate No: SSMC/GM/01/2022

Certified that the following minerals/metals used in purification of "Lingam" & preparation of "Lingam chendhooram" taken up for the CCRS Mini Research Project 2022 by **Miss. Shivani. G, Final Prof. BSMS**, Santhigiri Siddha Medical College, Thiruvananthapuram are correctly identified and authenticated through visual inspection experience, organoleptic characters, morphology, etc.

1. Lingam - Mercuric sulphide

Place: Santhigiri  
Date: 05.03.2022

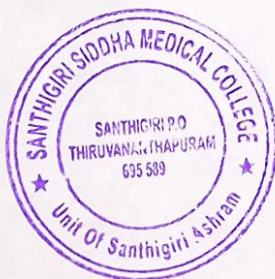

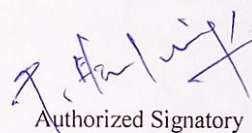  
Authorized Signatory

(Dr. S. ETHEL SHINY)  
LECTURER - HOD INCHARGE  
DEPT OF GUNAPADAM MARUTHIYAL

Head of the Department  
Department of Gunapadam Marunthiyal  
Santhigiri Siddha Medical College  
Santhigiri P.O Thiruvananthapuram - 695 589

Santhigiri P.O, Thiruvananthapuram-695589 ☎ 04712410316, 2410049 ✉ ssmc@santhigiriashram.org 🌐 www.santhigiriashram.org

Medical Education Division, Santhigiri Healthcare & Research Organization, Santhigiri Ashram, Central Office

Santhigiri P.O., Thiruvananthapuram-695589

✉ communication@santhigiriashram.org 🌐 www.santhigiriashram.org



**BOTANICAL CERTIFICATE**

Certificate No: SSMC/GM/02/2022

Certified that the following plant drug used in the purification of "Lingam" & preparation of "Lingam chendhooram" taken up for the CCRS Mini Research Project 2022 by **Miss. Shivani. G, Final Prof. BSMS**, Santhigiri Siddha Medical College, Thiruvananthapuram are identified through Visual inspection, Experience, Education & Training, Organoleptic characters, Morphology and Taxonomical methods as

1. *Acalypha indica* Linn. f. (Euphorbiaceae), leaves (Kuppaimeni ilai)
2. *Citrullus colocynthis* Linn. f. (Cucurbitaceae), whole plant (Aatruthumatti samoolam)

Place: Santhigiri  
Date: 05.03.2022

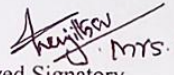  
Authorized Signatory

(ASSOCIATE PROFESSOR)

(DEPT. OF GUNAPADAM MARUNTHIYAL)

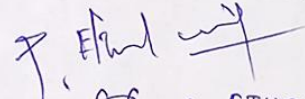  
(Dr. S. ETHEL SHINY)

LECTURER - HOD INCHARGE

DEPT OF GUNAPADAM MARUNTHIYAL

Head of the Department  
Department of Gunapadam Marunthiyal  
Santhigiri Siddha Medical College  
Santhigiri P.O Thiruvananthapuram - 695 589

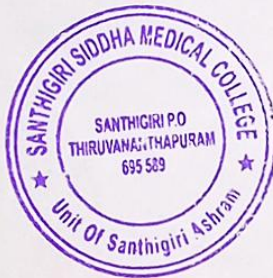

Santhigiri P.O, Thiruvananthapuram-695589 ☎ 04712410316, 2410049 ✉ ssmc@santhigirishram.org 🌐 www.santhigirishram.org

Medical Education Division, Santhigiri Healthcare & Research Organization, Santhigiri Ashram, Central Office

Santhigiri P.O., Thiruvananthapuram-695589

✉ communication@santhigirishram.org 🌐 www.santhigirishram.org

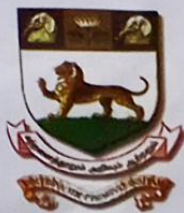

# சென்னைப் பல்கலைக்கழகம் UNIVERSITY OF MADRAS

**Dr. M.SURESH GANDHI, M.Sc., M.Phil., Ph.D**  
**PROFESSOR**

Department of Geology  
University of Madras  
Guindy Campus  
6th Floor, New Building  
Chennai - 600 025

**Date :** 24.6.2022

## **AUTHENTICATION OF THE MINERAL**

Physical Properties of the given specimen

|                   |   |                                                 |
|-------------------|---|-------------------------------------------------|
| Crystal structure | : | Hexagonal                                       |
| Molecular Weight  | : | 232.66 gm                                       |
| Environment       | : | Low temperature hydrothermal solutions in veins |
| Density           | : | 8.1                                             |
| Cleavage          | : | 1010 perfect                                    |
| Diaphaneity       | : | Transparent to translucent to opaque            |
| Hardness          | : | 2-2.5                                           |
| Luminescence      | : | Non Fluorescent                                 |
| Lusture           | : | Adamantine                                      |
| Streak            | : | bright red                                      |
| Reflectivity      | : | High                                            |

**References:**

NAME( Sinkankas66) PHYS. PROP.(Enc. of Minerals,2nd ed.,1990) OPTIC  
PROP.(AntBidBlaNic1)

Based on the Mineral data base, the given samples is identified and authenticated as  
CINNABAR (Mercuric sulphide) LINGAM.

*M. Suresh Gandhi*  
(M.SURESH GANDHI)

**Dr M Suresh Gandhi, M.Sc., M.Phil., Ph.D.**  
Professor  
Department of Geology  
University of Madras  
Guindy Campus.  
Chennai - 600 025.

**9B, Srikrishna Nagar, 11th Main Road, Madhavoyal, Chennai - 600 095**

**E-mail : msureshgandhi@gmail.com**

**Tel : 91-44- 22202789 : Fax : 91-44-22202789 : Mobile : 9443806534.**



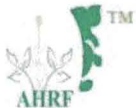**ASTHAGIRI HERBAL RESEARCH FOUNDATION**

AYUSH Drug Testing Lab No: 9, Dt.: 18/12/2017  
 SOC Reg. No: 667/2000 ; www.asthagiriherbal.org.in  
 162-A, Perungudi Industrial Estate, Perungudi, Chennai- 600096  
 Ph: 044-42055446, 98400 64340, 9003133744  
 Email: asthagiri.herbal@gmail.com, [cfo@asthagiriherbal.org.in](mailto:cfo@asthagiriherbal.org.in)

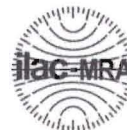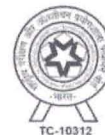**CERTIFICATE OF ANALYSIS**

The results declared pertain only to the sample submitted for testing

ULR NO: TC103122200000009F

|                |                         |               |            |
|----------------|-------------------------|---------------|------------|
| Test Report No | AHRF/JW5989/AAS/2021-22 | Date of Issue | 01/04/2022 |
|----------------|-------------------------|---------------|------------|

|                                              |                                                                                                                      |                       |            |
|----------------------------------------------|----------------------------------------------------------------------------------------------------------------------|-----------------------|------------|
| Customer details                             | Shivani .G Final Prof B.S.M.S Santhigiri Siddha Medical College<br>Santhigiri P.O Thiruvananthapuram Kerala - 695589 |                       |            |
| Parameters requested by customer for testing | As, Pb, Cd & Hg Analysis                                                                                             | Description of Sample | Powder     |
| Date of the sample received                  | By Courier 18/03/2022                                                                                                | Date of Analysis      | 23/03/2022 |
| Sample ID                                    | R                                                                                                                    | Sample Type           | Powder     |

**Method of Analysis**

|                                |                                                                                                                                     |
|--------------------------------|-------------------------------------------------------------------------------------------------------------------------------------|
| Test Method                    | USP 231<br>USP 39 NF34                                                                                                              |
| Method of Analysis             | AAS<br>AA200 series<br>Inorganic venture Standard Pb, Cd, Hg & As 1000 ppm<br>solution 1000 mg/ L sample in 1mol/L HNO <sub>3</sub> |
| Instrument                     |                                                                                                                                     |
| Model                          |                                                                                                                                     |
| Standard                       |                                                                                                                                     |
| Sample preparation for testing |                                                                                                                                     |
| Lambda max                     | Pb - 217.0 nm<br>Cd - 228.8 nm<br>Hg - 253.7 nm<br>As - 193.7 nm                                                                    |

**Report**

| Result of Analysis | Parameters | Results | AYUSH Limits |
|--------------------|------------|---------|--------------|
| 1                  | As         | 210.28  | 3.0 ppm      |
|                    | Hg         | 5.95    | 1.0 ppm      |
|                    | Cd         | 0.48    | 0.3 ppm      |
|                    | Pb         | 45.95   | 10 ppm       |

|                                 |                                         |                                                                                |
|---------------------------------|-----------------------------------------|--------------------------------------------------------------------------------|
| Prepared by:<br><i>Jasmine.</i> | Reviewed by:<br><i>Latha Narasimhan</i> | Approved by:<br><i>[Signature]</i><br>Technical Manager<br>(Dr. L. Narasimhan) |
|---------------------------------|-----------------------------------------|--------------------------------------------------------------------------------|

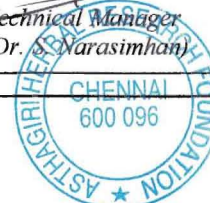

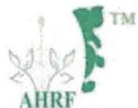**ASTHAGIRI HERBAL RESEARCH FOUNDATION**

AYUSH Drug Testing Lab No: 9, Dt.: 18/12/2017  
SOC Reg. No: 667/2000 ; [www.asthagiriherbal.org.in](http://www.asthagiriherbal.org.in)  
162-A, Perungudi Industrial Estate, Perungudi, Chennai- 600096  
Ph: 044-42055446, 98400 64340, 9003133744  
Email: [asthagiri.herbal@gmail.com](mailto:asthagiri.herbal@gmail.com), [cfo@asthagiriherbal.org.in](mailto:cfo@asthagiriherbal.org.in)

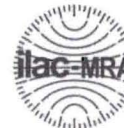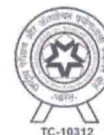**CERTIFICATE OF ANALYSIS**

The results declared pertain only to the sample submitted for testing

ULR NO: TC103122200000013F

|                |                         |               |            |
|----------------|-------------------------|---------------|------------|
| Test Report No | AHRF/JW6007/AAS/2022-23 | Date of Issue | 05/04/2022 |
|----------------|-------------------------|---------------|------------|

|                                              |                                                                                                                      |                       |            |
|----------------------------------------------|----------------------------------------------------------------------------------------------------------------------|-----------------------|------------|
| Customer details                             | Shivani .G Final Prof B.S.M.S Santhigiri Siddha Medical College<br>Santhigiri P.O Thiruvananthapuram Kerala - 695589 |                       |            |
| Parameters requested by customer for testing | As, Pb, Cd & Hg Analysis                                                                                             | Description of Sample | Powder     |
| Date of the sample received                  | By Courier 18/03/2022                                                                                                | Date of Analysis      | 29/03/2022 |
| Sample ID                                    | S01                                                                                                                  | Sample Type           | Powder     |

**Method of Analysis**

|                                |                                                                  |
|--------------------------------|------------------------------------------------------------------|
| Test Method                    | USP 231<br>USP 39 NF34                                           |
| Method of Analysis             | AAS                                                              |
| Instrument                     | AA200 series                                                     |
| Model                          | Inorganic venture Standard Pb, Cd, Hg & As 1000 ppm              |
| Standard                       | solution 1000 mg/ L sample in 1mol/L HNO <sub>3</sub>            |
| Sample preparation for testing |                                                                  |
| Lambda max                     | Pb - 217.0 nm<br>Cd - 228.8 nm<br>Hg - 253.7 nm<br>As - 193.7 nm |

**Report**

| Result of Analysis | Parameters | Results | AYUSH Limits |
|--------------------|------------|---------|--------------|
|                    | As         | 1482.83 | 3.0 ppm      |
|                    | Hg         | 6.397   | 1.0 ppm      |
|                    | Cd         | 0.298   | 0.3 ppm      |
|                    | Pb         | 42.79   | 10 ppm       |

|                                                                                                     |                                                                                                     |                                                                                                                                                   |
|-----------------------------------------------------------------------------------------------------|-----------------------------------------------------------------------------------------------------|---------------------------------------------------------------------------------------------------------------------------------------------------|
| Prepared by:<br> | Reviewed by:<br> | Approved by:<br><br>Technical Manager<br>(Dr. S. Narasimhan) |
|-----------------------------------------------------------------------------------------------------|-----------------------------------------------------------------------------------------------------|---------------------------------------------------------------------------------------------------------------------------------------------------|

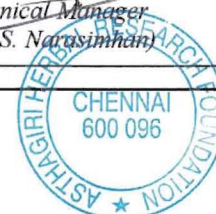

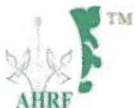**ASTHAGIRI HERBAL RESEARCH FOUNDATION**

AYUSH Drug Testing Lab No: 9, Dt.: 18/12/2017  
SOC Reg. No: 667/2000 ; [www.asthagiriherbal.org.in](http://www.asthagiriherbal.org.in)  
162-A, Perungudi Industrial Estate, Perungudi, Chennai- 600096  
Ph: 044-42055446, 98400 64340, 9003133744  
Email: [asthagiri.herbal@gmail.com](mailto:asthagiri.herbal@gmail.com), [cfo@asthagiriherbal.org.in](mailto:cfo@asthagiriherbal.org.in)

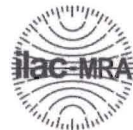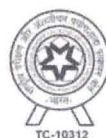**CERTIFICATE OF ANALYSIS**

The results declared pertain only to the sample submitted for testing

ULR NO: TC103122200000014F

|                |                         |               |            |
|----------------|-------------------------|---------------|------------|
| Test Report No | AHRF/JW6008/AAS/2022-23 | Date of Issue | 05/04/2022 |
|----------------|-------------------------|---------------|------------|

|                                              |                                                                                                                      |                       |            |
|----------------------------------------------|----------------------------------------------------------------------------------------------------------------------|-----------------------|------------|
| Customer details                             | Shivani .G Final Prof B.S.M.S Santhigiri Siddha Medical College<br>Santhigiri P.O Thiruvananthapuram Kerala - 695589 |                       |            |
| Parameters requested by customer for testing | As, Pb, Cd & Hg Analysis                                                                                             | Description of Sample | Powder     |
| Date of the sample received                  | By Courier 18/03/2022                                                                                                | Date of Analysis      | 29/03/2022 |
| Sample ID                                    | S02                                                                                                                  | Sample Type           | Powder     |

**Method of Analysis**

|                                |                                                                                                                                     |
|--------------------------------|-------------------------------------------------------------------------------------------------------------------------------------|
| Test Method                    | USP 231<br>USP 39 NF34                                                                                                              |
| Method of Analysis             | AAS<br>AA200 series<br>Inorganic venture Standard Pb, Cd, Hg & As 1000 ppm<br>solution 1000 mg/ L sample in 1mol/L HNO <sub>3</sub> |
| Instrument                     |                                                                                                                                     |
| Model                          |                                                                                                                                     |
| Standard                       |                                                                                                                                     |
| Sample preparation for testing |                                                                                                                                     |
| Lambda max                     | Pb - 217.0 nm<br>Cd - 228.8 nm<br>Hg - 253.7 nm<br>As - 193.7 nm                                                                    |

**Report**

| Result of Analysis | Parameters | Results | AYUSH Limits |
|--------------------|------------|---------|--------------|
|                    | As         | 1374.09 | 3.0 ppm      |
|                    | Hg         | 12.19   | 1.0 ppm      |
|                    | Cd         | 0.19    | 0.3 ppm      |
|                    | Pb         | 8.57    | 10 ppm       |

|                               |                                         |                                                                                |
|-------------------------------|-----------------------------------------|--------------------------------------------------------------------------------|
| Prepared by:<br><i>Jasmin</i> | Reviewed by:<br><i>Latha Narasimhan</i> | Approved by:<br><i>[Signature]</i><br>Technical Manager<br>(Dr. S. Narasimhan) |
|-------------------------------|-----------------------------------------|--------------------------------------------------------------------------------|

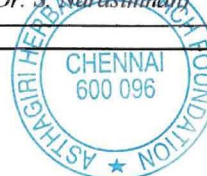



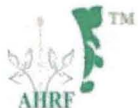**ASTHAGIRI HERBAL RESEARCH FOUNDATION**

AYUSH Drug Testing Lab No: 9, Dt: 18/12/2017  
 SOC Reg. No: 667/2000 ; [www.asthagiriherbal.org.in](http://www.asthagiriherbal.org.in)  
 162-A, Perungudi Industrial Estate, Perungudi, Chennai- 600096  
 Ph: 044-42055446, 98400 64340, 9003133744  
 Email: [asthagiri.herbal@gmail.com](mailto:asthagiri.herbal@gmail.com), [cfo@asthagiriherbal.org.in](mailto:cfo@asthagiriherbal.org.in)

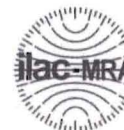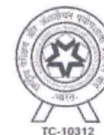**CERTIFICATE OF ANALYSIS**

The results declared pertain only to the sample submitted for testing

ULR NO: TC103122200000017F

|                |                         |               |            |
|----------------|-------------------------|---------------|------------|
| Test Report No | AHRF/JW6045/AAS/2022-23 | Date of Issue | 11/04/2022 |
|----------------|-------------------------|---------------|------------|

|                                              |                                                                                                                      |                       |            |
|----------------------------------------------|----------------------------------------------------------------------------------------------------------------------|-----------------------|------------|
| Customer details                             | Shivani .G Final Prof B.S.M.S Santhigiri Siddha Medical College<br>Santhigiri P.O Thiruvananthapuram Kerala - 695589 |                       |            |
| Parameters requested by customer for testing | As, Pb, Cd & Hg Analysis                                                                                             | Description of Sample | Powder     |
| Date of the sample received                  | By Courier 18/03/2022                                                                                                | Date of Analysis      | 29/03/2022 |
| Sample ID                                    | D01                                                                                                                  | Sample Type           | Powder     |

**Method of Analysis**

|                                |                                                                  |
|--------------------------------|------------------------------------------------------------------|
| Test Method                    | USP 231<br>USP 39 NF34                                           |
| Method of Analysis             | AAS                                                              |
| Instrument                     | AA200 series                                                     |
| Model                          | Inorganic venture Standard Pb, Cd, Hg & As 1000 ppm              |
| Standard                       | solution 1000 mg/ L sample in 1mol/L HNO <sub>3</sub>            |
| Sample preparation for testing |                                                                  |
| Lambda max                     | Pb - 217.0 nm<br>Cd - 228.8 nm<br>Hg - 253.7 nm<br>As - 193.7 nm |

**Report**

| Result of Analysis | Parameters | Results | AYUSH Limits |
|--------------------|------------|---------|--------------|
|                    | As         | 63.37   | 3.0 ppm      |
|                    | Hg         | 4.53    | 1.0 ppm      |
|                    | Cd         | BDL     | 0.3 ppm      |
|                    | Pb         | 8.64    | 10 ppm       |

|                                                                                                     |                                                                                                     |                                                                                                                                                   |
|-----------------------------------------------------------------------------------------------------|-----------------------------------------------------------------------------------------------------|---------------------------------------------------------------------------------------------------------------------------------------------------|
| Prepared by:<br> | Reviewed by:<br> | Approved by:<br><br>Technical Manager<br>(Dr. S. Narasimhan) |
|-----------------------------------------------------------------------------------------------------|-----------------------------------------------------------------------------------------------------|---------------------------------------------------------------------------------------------------------------------------------------------------|

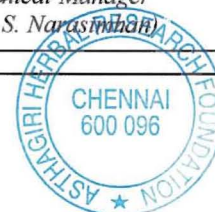



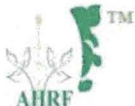**ASTHAGIRI HERBAL RESEARCH FOUNDATION**

AYUSH Drug Testing Lab No: 9, Dt.: 18/12/2017  
SOC Reg. No: 667/2000 ; [www.asthagiriherbal.org.in](http://www.asthagiriherbal.org.in)  
162-A, Perungudi Industrial Estate, Perungudi, Chennai- 600096  
Ph: 044-42055446, 98400 64340, 9003133744  
Email: [asthagiri.herbal@gmail.com](mailto:asthagiri.herbal@gmail.com), [cfo@asthagiriherbal.org.in](mailto:cfo@asthagiriherbal.org.in)

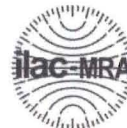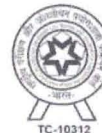**CERTIFICATE OF ANALYSIS**

The results declared pertain only to the sample submitted for testing

ULR NO: TC103122200000018F

|                |                         |               |            |
|----------------|-------------------------|---------------|------------|
| Test Report No | AHRF/JW6046/AAS/2022-23 | Date of Issue | 11/04/2022 |
|----------------|-------------------------|---------------|------------|

|                                              |                                                                                                                      |                       |            |
|----------------------------------------------|----------------------------------------------------------------------------------------------------------------------|-----------------------|------------|
| Customer details                             | Shivani .G Final Prof B.S.M.S Santhigiri Siddha Medical College<br>Santhigiri P.O Thiruvananthapuram Kerala - 695589 |                       |            |
| Parameters requested by customer for testing | As, Pb, Cd & Hg Analysis                                                                                             | Description of Sample | Powder     |
| Date of the sample received                  | By Courier 18/03/2022                                                                                                | Date of Analysis      | 29/03/2022 |
| Sample ID                                    | D02                                                                                                                  | Sample Type           | Powder     |

**Method of Analysis**

|                                |                                                                  |
|--------------------------------|------------------------------------------------------------------|
| Test Method                    | USP 231<br>USP 39 NF34                                           |
| Method of Analysis             | AAS                                                              |
| Instrument                     | AA200 series                                                     |
| Model                          | Inorganic venture Standard Pb, Cd, Hg & As 1000 ppm              |
| Standard                       | solution 1000 mg/ L sample in 1mol/L HNO <sub>3</sub>            |
| Sample preparation for testing |                                                                  |
| Lambda max                     | Pb - 217.0 nm<br>Cd - 228.8 nm<br>Hg - 253.7 nm<br>As - 193.7 nm |

**Report**

| Result of Analysis | Parameters | Results | AYUSH Limits |
|--------------------|------------|---------|--------------|
|                    | As         | 88.26   | 3.0 ppm      |
|                    | Hg         | 2.93    | 1.0 ppm      |
|                    | Cd         | BDL     | 0.3 ppm      |
|                    | Pb         | 165.97  | 10 ppm       |

|                  |                  |                                                              |
|------------------|------------------|--------------------------------------------------------------|
| Prepared-by:<br> | Reviewed by:<br> | Approved by:<br><br>Technical Manager<br>(Dr. S. Narasimhan) |
|------------------|------------------|--------------------------------------------------------------|

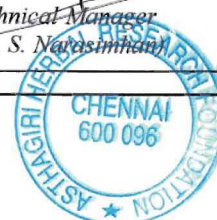

Supplement: Supplementary file 1 [file j_jcim-2024-0052_suppl_001.pdf]
